# Supplementary material for: Serotonin/5-HT1A Signaling in the Neurovascular Unit Regulates Endothelial CLDN5 Expression
Source: PubMed Central journal article supplement (PMC7795278; doi:10.3390/ijms22010254), 2020-12-29
Supplement: ijms-22-00254-s001.pdf [file ijms-22-00254-s001.pdf]

Figure S1

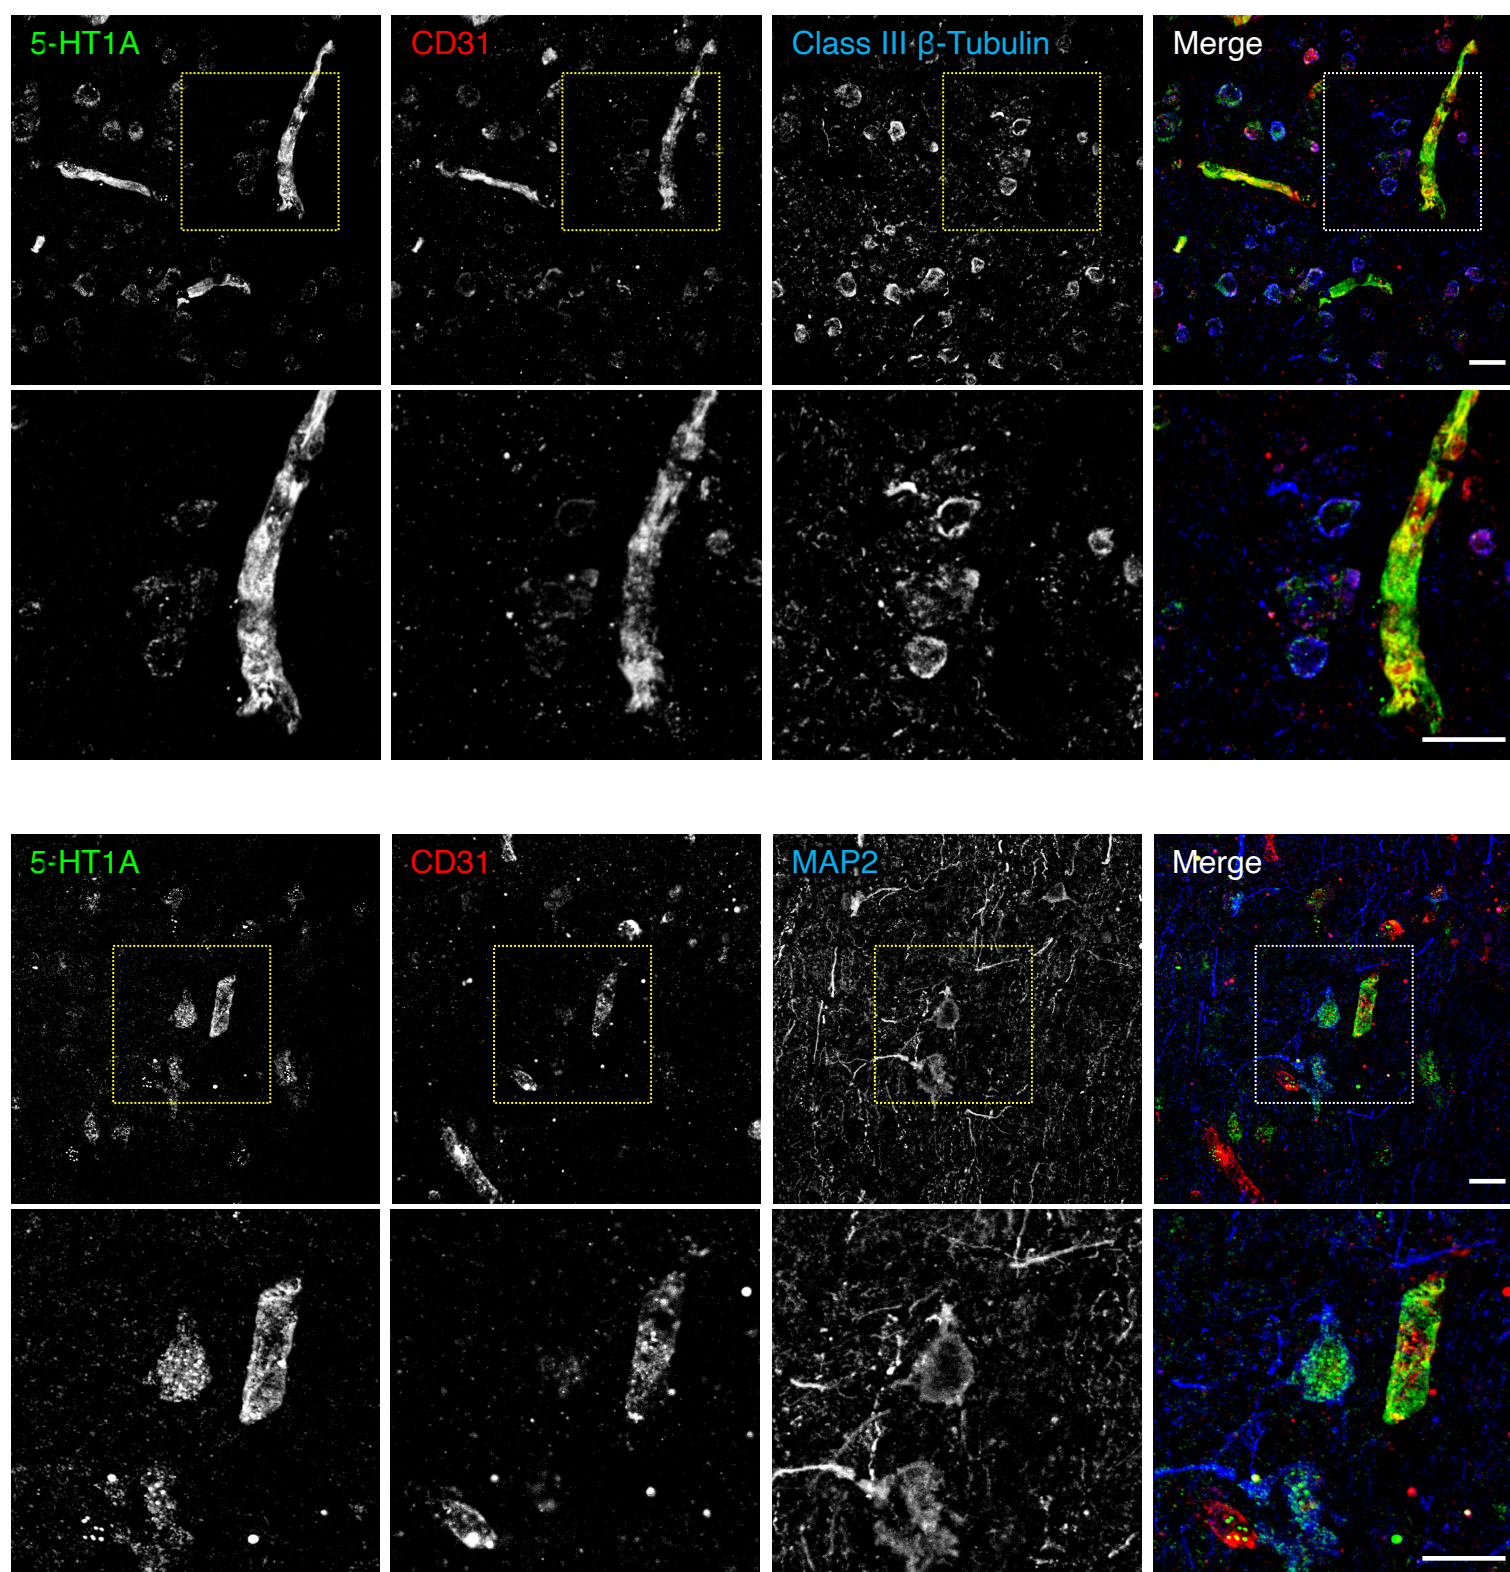

**Figure S1.** 5-HT1A receptor is expressed in microvascular endothelial and perivascular cells of normal human PFC. The normal PFC gray matter, which was obtained from a different donor than that in Figure 1, was stained for 5-HT1A and CD31 together with either class III  $\beta$ -tubulin or MAP2. Scale bars, 20  $\mu$ m.

Supplementary table 1. Antibodies

| Antigen                    | Host    | M/P        | Dilution | Source                  | Identifier  |
|----------------------------|---------|------------|----------|-------------------------|-------------|
| 5-HT1A                     | Rabbit  | Polyclonal | 1:100    | GeneTex                 | N3C1        |
| $\alpha$ SMA               | Mouse   | Monoclonal | 1:200    | Dako                    | M0851       |
| CD31                       | Mouse   | Monoclonal | 1:100    | Dako                    | M0823       |
| CD34                       | Mouse   | Monoclonal | 1:101    | Dako                    | M7165       |
| Class III $\beta$ -Tubulin | Chicken | Polyclonal | 1:100    | abcam                   | ab41489     |
| CLDN5                      | Mouse   | Monoclonal | 1:100    | ThermoFisher SCIENTIFIC | 35-2500     |
| CLDN5                      | Rabbit  | Polyclonal | 1:200    | IBL                     | 18855       |
| GFAP                       | Mouse   | Monoclonal | 1:100    | Sigma-Aldrich           | G3893       |
| MAP2                       | Chicken | Polyclonal | 1:100    | abcam                   | ab5392      |
| PDGFR $\beta$              | Goat    | Polyclonal | 1:100    | R&D systems             | AF385       |
| pPKA $\alpha/\beta/\gamma$ | Rabbit  | Polyclonal | 1:500    | Santa Cruz              | 32968       |
| ZO-1                       | Rabbit  | Polyclonal | 1:200    | ThermoFisher SCIENTIFIC | 61-7300     |
| Rabbit IgG (Alexa 488)     | Donkey  | Polyclonal | 1:200    | Jackson ImmunoResearch  | 711-545-152 |
| Chicken IgG (Cy3)          | Goat    | Polyclonal | 1:200    | abcam                   | ab97145     |
| Goat IgG (Cy3)             | Donkey  | Polyclonal | 1:200    | Jackson ImmunoResearch  | 705-165-147 |
| Mouse IgG (Cy3)            | Donkey  | Polyclonal | 1:201    | Jackson ImmunoResearch  | 715-165-150 |
| Mouse IgG (Alexa 647)      | Donkey  | Polyclonal | 1:200    | Jackson ImmunoResearch  | 211-605-109 |
